# Supplementary material
Source: HighWire-hosted journal article supplement (https://erj.ersjournals.com/content/56/1/2001601)
Supplement: inline-supplementary-material-1 [file inline-supplementary-material-1.pdf]

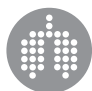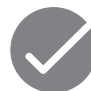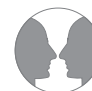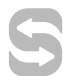

SHAREABLE PDF

# What do differences in case fatality ratios between children and adults tell us about COVID-19?

Stefan Ebmeier  and Aubrey J. Cunnington

**Affiliation:** Section of Paediatric Infectious Disease, St Mary's Campus Medical School Building, Imperial College London, London, UK.

**Correspondence:** Aubrey J. Cunnington, Section of Paediatric Infectious Disease, St Mary's Campus, Imperial College London, Medical School Building, Norfolk Place, London, W2 1PG, UK. E-mail: a.cunnington@imperial.ac.uk

 @ERSpublications

**When individuals without prior immunity are considered, case fatality ratios are typically higher in adults than in children for most infectious diseases, with few exceptions** <https://bit.ly/2Wsi6iJ>

**Cite this article as:** Ebmeier S, Cunnington AJ. What do differences in case fatality ratios between children and adults tell us about COVID-19?. *Eur Respir J* 2020; 56: 2001601 [<https://doi.org/10.1183/13993003.01601-2020>].

This single-page version can be shared freely online.

## To the Editor:

CRISTIANI *et al.* [1] have raised interesting questions in their editorial discussing the differences in coronavirus disease 2019 (COVID-19) morbidity and mortality between children and adults. The authors proposed a number of possible reasons to explain why children suffer less severe illness, including age-related variation in angiotensin-converting enzyme (ACE)2 receptor expression, trained immunity, and differences in lymphocyte and natural killer cell abundance. Whilst these hypotheses may be correct, we wish to challenge the notion that greater morbidity and mortality in adults is a remarkable feature of COVID-19. This is, in fact, the typical situation for most infections occurring in the absence of prior immunity.
